# Supplementary material for: The Reliability and Compatibility of the Paper and Electronic Versions of the POLLEK Cohort Study Questionnaire
Source: PubMed Central journal article supplement (PMC7711888; doi:10.3390/healthcare8040438), 2020-10-29
Supplement: healthcare-08-00438-s001.pdf [file healthcare-08-00438-s001.pdf]

**Table S1.** Repeatability of answers to particular questions.

| <b>Selected** General Questions</b>                                                           | <b><math>\kappa</math></b> | <b>95% CI</b> | <b><math>\rho</math></b> | <b><math>\tau</math></b> |
|-----------------------------------------------------------------------------------------------|----------------------------|---------------|--------------------------|--------------------------|
| M1. Gender                                                                                    | 0.96                       | 0.93-0.99     | 0.96                     | 0.96                     |
| M2. Age [years]                                                                               | 0.98                       | 0.96-1        | 1                        | 0.99                     |
| M3. Marital status                                                                            | 0.96                       | 0.93-0.99     | 0.96                     | 0.96                     |
| M8A. Source of income-dependent on parents                                                    | 0.76                       | 0.58-0.95     | 0.78                     | 0.78                     |
| M8B. Source of income-scholarship                                                             | 0.78                       | 0.64-0.91     | 0.79                     | 0.79                     |
| M8C. Source of income-pension or allowance                                                    | 0.83                       | 0.66-0.99     | 0.84                     | 0.84                     |
| M8D. Source of income-earning work                                                            | 0.83                       | 0.74-0.93     | 0.84                     | 0.84                     |
| M8E. Source of income-other                                                                   | 0.48                       | 0.33-0.64     | 0.57                     | 0.57                     |
| M9. Current financial situation                                                               | 0.87                       | 0.82-0.91     | 0.85                     | 0.84                     |
| M9. Current financial situation [4 categories]                                                | 0.87                       | 0.82-0.91     | 0.85                     | 0.84                     |
| M9. Current financial situation [3 categories]                                                | 0.87                       | 0.83-0.92     | 0.87                     | 0.86                     |
| M10. Current place of residence during studies                                                | 0.97                       | 0.95-1        | 0.98                     | 0.98                     |
| M11. Have you ever smoked so-called traditional cigarettes?                                   | 0.92                       | 0.87-0.96     | 0.92                     | 0.92                     |
| M12. Have you ever smoked electronic cigarettes?                                              | 0.95                       | 0.91-0.98     | 0.95                     | 0.95                     |
| M14. Do you take up sports activities to improve physical fitness?                            | 0.97                       | 0.95-0.99     | 0.98                     | 0.98                     |
| M15. How do you assess the current state of your health?                                      | 0.77                       | 0.71-0.82     | 0.86                     | 0.83                     |
| M16. Have you ever been diagnosed with a chronic disease by a doctor?                         | 0.95                       | 0.9-0.99      | 0.95                     | 0.95                     |
| M16_2. If yes, are you under constant medical care?                                           | 0.96                       | 0.9-1         | 0.97                     | 0.97                     |
| <b>Nutrition</b>                                                                              | <b><math>\kappa</math></b> | <b>95% CI</b> | <b><math>\rho</math></b> | <b><math>\tau</math></b> |
| M17. How many meals do you eat per day?                                                       | 0.91                       | 0.87-0.95     | 0.94                     | 0.93                     |
| M18. How many meals do you eat that contain animal protein?                                   | 0.87                       | 0.82-0.92     | 0.89                     | 0.87                     |
| M19. How often do you consume milk or milk products?                                          | 0.88                       | 0.84-0.93     | 0.89                     | 0.88                     |
| M20. How often do you eat fruit and vegetables?                                               | 0.89                       | 0.85-0.93     | 0.92                     | 0.91                     |
| M21. How often do you eat vegetable or fruit salads?                                          | 0.86                       | 0.81-0.91     | 0.91                     | 0.89                     |
| <b>WHOQOL-BREF</b>                                                                            | <b><math>\kappa</math></b> | <b>95% CI</b> | <b><math>\rho</math></b> | <b><math>\tau</math></b> |
| B1. How would you rate your quality of life                                                   | 0.78                       | 0.73-0.84     | 0.86                     | 0.84                     |
| B2. How satisfied are you with your health                                                    | 0.82                       | 0.77-0.87     | 0.89                     | 0.86                     |
| B3. To what extent do you feel that physical pain prevents you from doing what you need to do | 0.84                       | 0.79-0.89     | 0.88                     | 0.86                     |
| B4. How much do you need any medical treatment to function in your daily life                 | 0.79                       | 0.73-0.85     | 0.87                     | 0.84                     |
| B5. How much do you enjoy life                                                                | 0.81                       | 0.76-0.86     | 0.87                     | 0.85                     |
| B6. To what extent do you feel your life to be meaningful                                     | 0.86                       | 0.82-0.9      | 0.92                     | 0.9                      |

|                                                                                                                                       |                            |               |                            |                            |
|---------------------------------------------------------------------------------------------------------------------------------------|----------------------------|---------------|----------------------------|----------------------------|
| B7. How well are you able to concentrate                                                                                              | 0.81                       | 0.76-0.86     | 0.89                       | 0.87                       |
| B8. How safe do you feel in your daily life                                                                                           | 0.8                        | 0.74-0.85     | 0.87                       | 0.84                       |
| B9. How healthy is your physical environment                                                                                          | 0.81                       | 0.76-0.86     | 0.87                       | 0.84                       |
| B10. Do you have enough energy for everyday life                                                                                      | 0.76                       | 0.7-0.81      | 0.85                       | 0.82                       |
| B11. Are you able to accept your bodily appearance                                                                                    | 0.9                        | 0.87-0.94     | 0.93                       | 0.92                       |
| B12. Have you enough money to meet your needs                                                                                         | 0.82                       | 0.77-0.87     | 0.89                       | 0.87                       |
| B13. How available to you is the information that you need in your day-to-day life                                                    | 0.78                       | 0.72-0.83     | 0.85                       | 0.83                       |
| B14. To what extent do you have the opportunity for leisure activities                                                                | 0.79                       | 0.74-0.84     | 0.92                       | 0.88                       |
| B15. How well are you able to get around                                                                                              | 0.7                        | 0.64-0.76     | 0.84                       | 0.8                        |
| B16. How satisfied are you with your sleep                                                                                            | 0.86                       | 0.82-0.91     | 0.94                       | 0.92                       |
| B17. How satisfied are you with your ability to perform your daily living activities                                                  | 0.77                       | 0.72-0.82     | 0.85                       | 0.82                       |
| B18. How satisfied are you with your capacity for work                                                                                | 0.76                       | 0.7-0.81      | 0.88                       | 0.85                       |
| B19. How satisfied are you with yourself                                                                                              | 0.78                       | 0.73-0.83     | 0.86                       | 0.83                       |
| B20. How satisfied are you with your personal relationships                                                                           | 0.77                       | 0.72-0.83     | 0.86                       | 0.83                       |
| B21. How satisfied are you with your sex life                                                                                         | 0.89                       | 0.85-0.93     | 0.96                       | 0.94                       |
| B22. How satisfied are you with the support you get from your friends                                                                 | 0.82                       | 0.77-0.87     | 0.9                        | 0.88                       |
| B23. How satisfied are you with the conditions of your living place                                                                   | 0.85                       | 0.81-0.9      | 0.92                       | 0.9                        |
| B24. How satisfied are you with your access to health services                                                                        | 0.79                       | 0.74-0.85     | 0.88                       | 0.85                       |
| B25. How satisfied are you with your transport                                                                                        | 0.87                       | 0.83-0.91     | 0.91                       | 0.9                        |
| B26. How often do you have negative feelings such as blue mood, despair, anxiety, depression                                          | 0.8                        | 0.75-0.85     | 0.83                       | 0.81                       |
| <b>Alcohol Use Disorder Identification Test (AUDIT)</b>                                                                               | <b><math>\kappa</math></b> | <b>95% CI</b> | <b><math>\rho^*</math></b> | <b><math>\tau^*</math></b> |
| A1. How often do you have a drink containing alcohol?                                                                                 | 0.86                       | 0.82-0.91     | 0.92                       | 0.9                        |
| A2. How many drinks containing alcohol do you have on a typical day when you are drinking?                                            | 0.9                        | 0.86-0.93     | 0.95                       | 0.94                       |
| A3. How often do you have six or more drinks on one occasion?                                                                         | 0.84                       | 0.79-0.89     | 0.91                       | 0.89                       |
| A4. How often during the last year have you found that you were not able to stop drinking once you had started?                       | 0.77                       | 0.69-0.86     | 0.87                       | 0.86                       |
| A5. How often during the last year have you failed to do what was normally expected from you because of drinking?                     | 0.84                       | 0.78-0.89     | 0.87                       | 0.86                       |
| A6. How often during the last year have you needed a first drink in the morning to get yourself going after a heavy drinking session? | 0.81                       | 0.71-0.9      | 0.83                       | 0.82                       |
| A7. How often during the last year have you had a feeling of guilt or remorse after drinking?                                         | 0.79                       | 0.73-0.85     | 0.83                       | 0.82                       |
| A8. How often during the last year have you been unable to remember what happened the night before because you had been drinking?     | 0.9                        | 0.85-0.95     | 0.92                       | 0.91                       |
| A9. Have you or someone else been injured as a result of your drinking?                                                               | 0.97                       | 0.93-1        | 0.98                       | 0.97                       |
| A10. Has a relative or friend or a doctor or another health worker been concerned about your drinking or suggested you cut down?      | 0.81                       | 0.69-0.92     | 0.83                       | 0.83                       |

Legend:  $\kappa$ —unweighted Cohen's *kappa*; CI—confidence interval;  $\rho$ —Spearman's *rho*;  $\tau$ —Kendall's *tau*; \*—all  $\tau$  and  $\rho$  significant at  $p < 0.0001$ ; \*\*—appropriate for analysis.
